# Supplementary material
Source: publisher figshare collection journal article supplement (https://acs.figshare.com/ndownloader/files/4692775)
Supplement: Supplementary file 1 [file 4692775]

# Efficient charge transport through a metal oxide semiconductor in the nanocomposite film with tris(2,2'-bipyridine)ruthenium(II)

Koji Sone<sup>a),c)</sup>, Masahiro Teraguchi<sup>b),c)</sup>, Takashi Kaneko<sup>c)</sup>, Toshiki Aoki<sup>b),c)</sup>, Masayuki Yagi<sup>a),c)</sup>\*

<sup>a)</sup> Faculty of Education and Human Sciences, Niigata University, 8050 Ikarashi-2, Niigata 950-2181, Japan.

<sup>b)</sup> Faculty of Engineering, Niigata University, 8050 Ikarashi-2, Niigata 950-2181, Japan.

<sup>c)</sup> Center for Transdisciplinary Research, Niigata University, 8050 Ikarashi-2, Niigata 950-2181, Japan.

## Supporting Information

Figure S1 The plot of the initial current density ( $j$ ) at  $t = 10$  ms vs  $E_f$  in the Cottrell plots of a Ru-WO<sub>3</sub> film.

Figure S2 Cottrell plots in PSCAS measurement of a neat WO<sub>3</sub> film in a 0.1 M KNO<sub>3</sub> aqueous solution (pH = 1.2) as measured with  $E_f$  changed.

Figure S3 Cottrell plots in PSCAS measurement of a Ru-WO<sub>3</sub> film and a Ru-Nf film in a potential step from 0.4 V to 1.5 V vs SCE in a 0.1 M KNO<sub>3</sub> aqueous solution (pH = 1.2) as measured at different temperature.

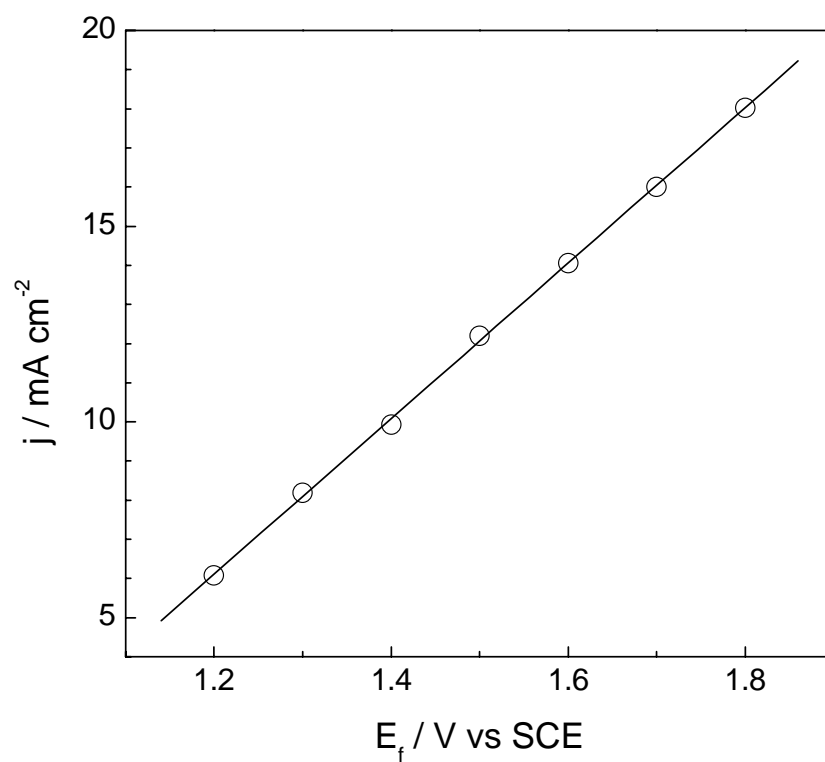

Figure S1 The plot of the initial current density ( $j$ ) at  $t = 10$  ms vs  $E_f$  in the Cottrell plots of a Ru-WO<sub>3</sub> film ( $\Gamma_{\text{Ru}} = 2.0 \times 10^{-8} \text{ mol cm}^{-2}$ ). The conditions are indicated in Figure 3.

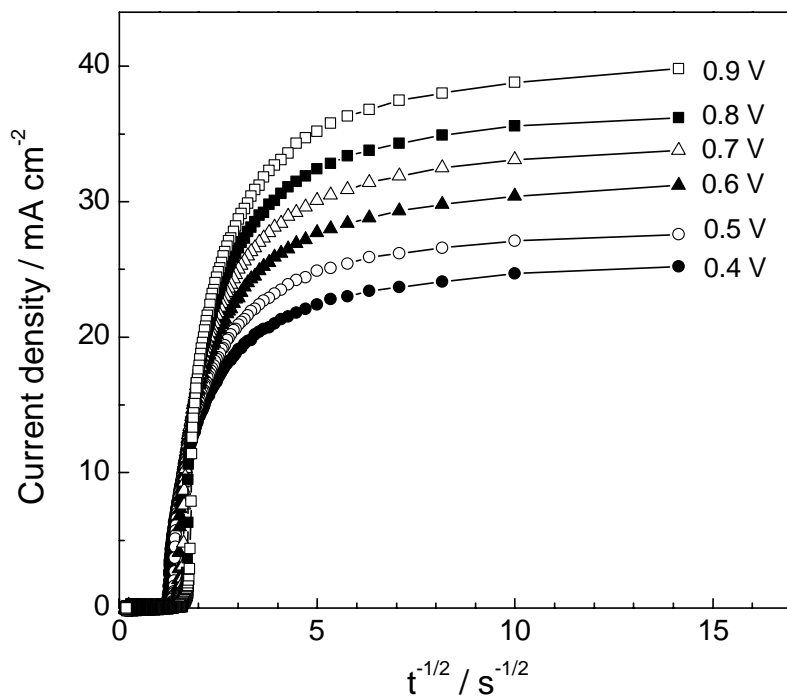

Figure S2 Cottrell plots in PSCAS measurement of a neat WO<sub>3</sub> film in a 0.1 M KNO<sub>3</sub> aqueous solution (pH = 1.2) as measured with  $E_f$  changed from 0.4 V to 0.9 V vs SCE.

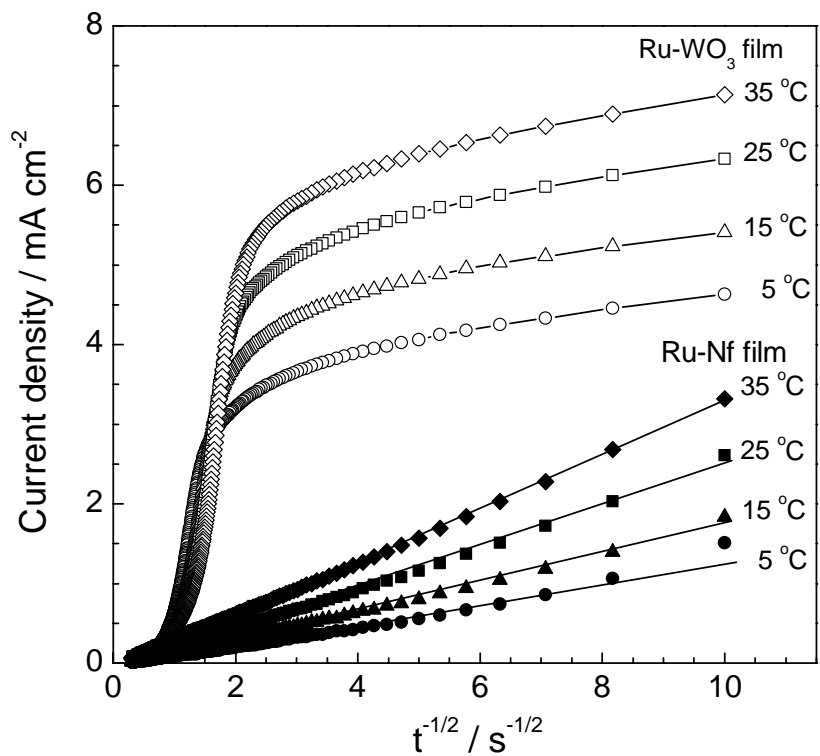

Figure S3 Cottrell plots in PSCAS measurement of a Ru-WO<sub>3</sub> film (open symbols,  $\Gamma_{\text{Ru}} = 2.4 \times 10^{-8} \text{ mol cm}^{-2}$ ) and a Ru-Nf film (closed symbols,  $\Gamma_{\text{Ru}} = 2.3 \times 10^{-8} \text{ mol cm}^{-2}$ ) in a potential step from 0.4 V to 1.5 V vs SCE in a 0.1 M KNO<sub>3</sub> aqueous solution (pH = 1.2) as measured at different temperature.
